# Supplementary material for: M2-TAMs promote immunoresistance in lung adenocarcinoma by enhancing METTL3-mediated m6A methylation
Source: PubMed Central journal article supplement — Ann Transl Med. 2022 Dec;10(24):1380. doi: 10.21037/atm-22-6104 (PMC9843413; doi:10.21037/atm-22-6104), 2022-12
Supplement: atm-10-24-1380-supplementary.pdf [file atm-10-24-1380-supplementary.pdf]

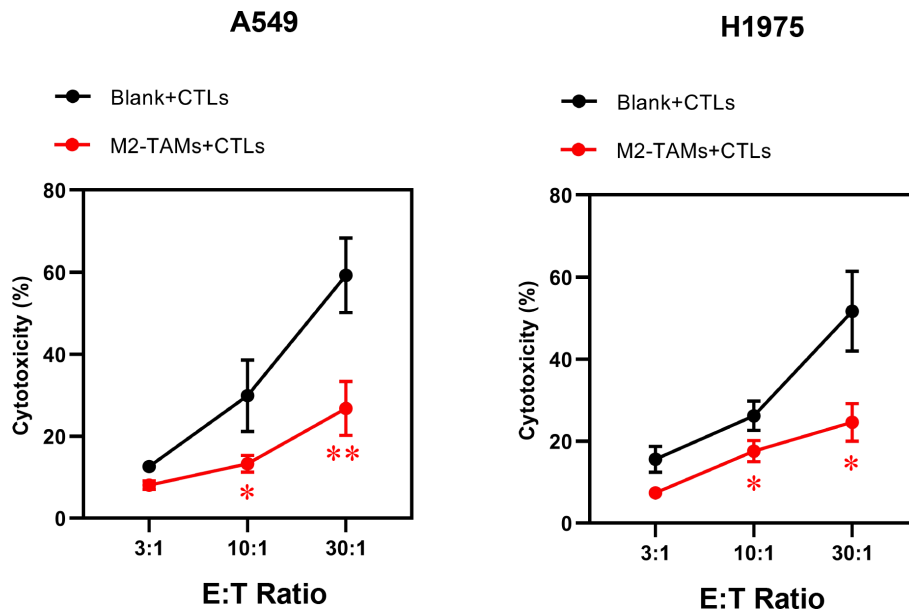

**Figure S1** M2-TAMs significantly attenuated the cytotoxicity of CTLs on LUAD cells. The T cell cytotoxicity assay was carried out on 96-well culture plates, and the percentage of CTL lysis to A549 and H1975 cells was calculated by detecting the fluorescence intensity of each well, n=3. Data were presented as mean  $\pm$  SEM, \* P<0.05 and \*\* P<0.01, according to two-tailed independent *t*-test. M2-TAMs, M2 phenotype tumor-associated macrophages; LUAD, lung adenocarcinoma.

**Table S1** Real-time PCR primer sequences in the experiment

| Gene           | Forward primer (5'-3') | Reverse primer (5'-3')   |
|----------------|------------------------|--------------------------|
| <i>METTL3</i>  | CAAGCTGCACTTCAGACGAA-  | GCTTGGCGTGTGGTCTTT       |
| <i>METTL14</i> | CTACCCATCCTCACTGTCAGTC | GGATGTTCCCTGTTTGACCTGAGG |
| <i>RBM15</i>   | TCCCACCTTGAGATTCTCC    | GTCAGCGCCAAGTTTTCTCT     |
| <i>WTAP</i>    | CTTCCCAAGAAGGTTGATTGA  | TCAGACTCTCTTAGGCCAGTTAC  |
| <i>VIRMA</i>   | AATCCTGTGGGAAGATCAGC   | ACACGTAAGGCAGTGGAAG      |
| <i>FTO</i>     | CCAGAACCTGAGGAGAGAATGG | CGATGTCTGTGAGGTCAAACGG   |
| <i>ALKBH</i>   | CCAGCTATGCTTCAGATCGCCT | GGTTCTCTTCCTTGCCATCTCC   |
| <i>GAPDH5</i>  | TGACTTCAACAGCGACACCCA  | CACCCTGTTGCTGTAGCCAA     |
